# Supplementary material for: Two Ecdysteroids Isolated from Micropropagated Lychnis flos-cuculi and the Biological Activity of Plant Material
Source: MDPI journal article supplement (doi:10.3390/molecules26040904), 2021-02-09
Supplement: s1 [file s1]

# Two Ecdysteroids Isolated from Micropropagated *Lychnis flos-cuculi* and Biological Activity of Plant Material

Michał P. Maliński <sup>1\*</sup>, Jaromir Budzianowski <sup>1</sup>, Małgorzata Kikowska <sup>1</sup>, Monika Derda <sup>2</sup>, Marcelina M. Jaworska <sup>3</sup>, Dariusz T. Młynarczyk <sup>4</sup>, Marta Szukalska <sup>5</sup>, Ewa Florek <sup>5</sup> and Barbara Thiem <sup>1</sup>

<sup>1</sup> Chair and Department of Pharmaceutical Botany and Plant Biotechnology, Poznan University of Medical Sciences; 14 Sw. Marii Magdaleny St., 61-861 Poznań, Poland; jbudzian@ump.edu.pl (J.B.); kikowska@ump.edu.pl (M.K.); bthiem@ump.edu.pl (B.T.)

<sup>2</sup> Chair and Department of Biology and Medical Parasitology, Poznan University of Medical Sciences; 10 Fredry St., 61-701 Poznań, Poland; mderda@ump.edu.pl (M.D.)

<sup>3</sup> Chair and Department of Genetics and Pharmaceutical Microbiology, Poznan University of Medical Sciences; 4 Święckiego St., 60-781 Poznań, Poland; marcelinajaworska@ump.edu.pl (M.J.)

<sup>4</sup> Chair and Department of Chemical Technology of Drugs, Poznan University of Medical Sciences, 6 Grunwaldzka St., 60-780 Poznań, Poland; mlynarczykd@ump.edu.pl (D.T.M.)

<sup>5</sup> Laboratory of Environmental Research, Department of Toxicology, Poznan University of Medical Sciences, 30 Dojazd St., 60-631 Poznań, Poland; martan@ump.edu.pl (M.N.); eflorek@ump.edu.pl (E.F.)

\* Correspondence: mpmalinski@ump.edu.pl

## Contents

### Compound 1 (20-hydroxyecdysone)

**Figure S1.** <sup>1</sup>H NMR spectrum (500 MHz, CD<sub>3</sub>OD) of compound **1**.

**Figure S2.** <sup>13</sup>C NMR spectrum (125 MHz, CD<sub>3</sub>OD) of compound **1**.

**Figure S3.** HH-COSY spectrum of compound **1**.

**Figure S4.** HSQC spectrum (500/125 MHz, CD<sub>3</sub>OD) of compound **1**.

**Figure S5.** HMBC spectrum (500/125 MHz, CD<sub>3</sub>OD) of compound **1**.

**Figure S6.** NOESY spectrum (500 MHz, CD<sub>3</sub>OD) of compound **2**.

### Compound 2 (polypodine B)

**Figure S7.** <sup>1</sup>H NMR spectrum (500 MHz, CD<sub>3</sub>OD) of compound **2**.

**Figure S8.** <sup>13</sup>C NMR spectrum (125 MHz, CD<sub>3</sub>OD) of compound **2**.

**Figure S9.** HH-COSY spectrum (500 MHz, CD<sub>3</sub>OD) of compound **2**.

**Figure S10.** HSQC spectrum (500/125 MHz, CD<sub>3</sub>OD) of compound **2**.

**Figure S11.** HMBC spectrum (500/125 MHz, CD<sub>3</sub>OD) of compound **2**.

**Figure S12.** NOESY spectrum (500 MHz, CD<sub>3</sub>OD) of compound **2**.

**Figure S13.** MALDI mass spectrum of 20-hydroxyecdysone (**1**).

**Figure S14.** MALDI mass spectrum of polypodine B (**2**).

**Figure S15.** Concentration-dependent UV-Vis spectra of 20-hydroxyecdysone recorded in methanol.

**Figure S16.** Concentration-dependent UV-Vis spectra of polypodine B recorded in ethanol.

**Figure S17.** FT-IR spectra of 20-hydroxyecdysone (**1**) and polypodine B (**2**).

**Figure S18.** HPLC-DAD chromatogram of isolated 20-hydroxyecdysone (**1**).

**Figure S19.** HPLC-DAD chromatogram of isolated polypodine B (**2**).

**Figure S20.** HPLC-DAD chromatogram of 40% methanolic root fraction showing 20-hydroxyecdysone and polypodine B.

**Figure S21.** HPLC-DAD chromatogram of 80% methanolic root fraction showing 20-hydroxyecdysone and polypodine B.

**Figure S22.** HPLC-DAD chromatogram of 40% methanolic herb fraction showing 20-hydroxyecdysone and polypodine B.

**Figure S23.** HPLC-DAD chromatogram of 80% methanolic herb fraction showing 20-hydroxyecdysone and polypodine B.

**Figure S24.** HPLC-DAD chromatogram of 40% methanolic callus fraction showing no ecdysteroids.

**Figure S25.** HPLC-DAD chromatogram of 80% methanolic callus fraction showing no ecdysteroids.

**Table S1.** The effect of nystatin (positive control) on *Acanthamoeba* trophozoite inhibition during three-day treatment.

**Table S2.** The toxicity of studied 40% and 80% aqueous methanolic fractions from *Lychnis flos-cuculi* extracts and isolated ecdysteroids against *Aliivibrio fischeri* after 5 and 15 minutes, measured with the use of Microtox assay.

**Table S3.** Concentration of 20-hydroxyecdysone and polypodine B in respective dilutions of different *Lychnis flos-cuculi* material samples used in antiamoebic activity bioassay.

## Compound 1 (20-hydroxyecdysone)

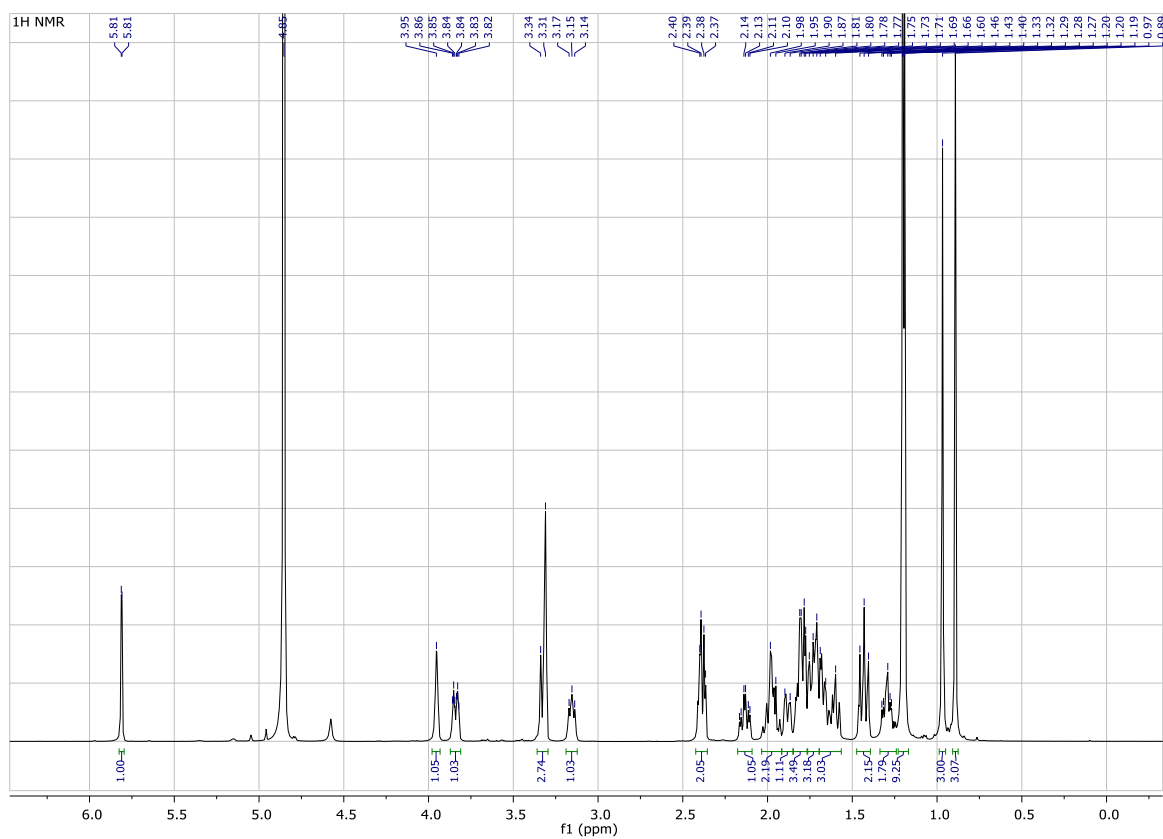

Figure S1. <sup>1</sup>H NMR spectrum (500 MHz, CD<sub>3</sub>OD) of compound 1.

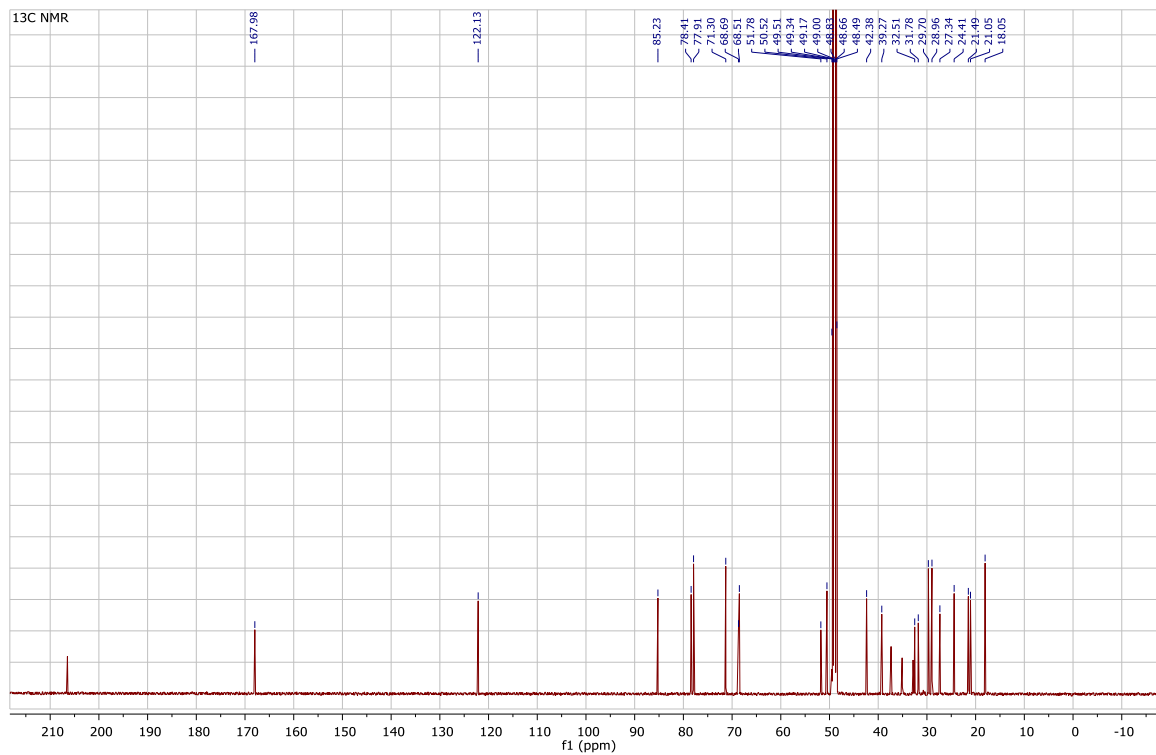

Figure S2. <sup>13</sup>C NMR spectrum (125 MHz, CD<sub>3</sub>OD) of compound 1.

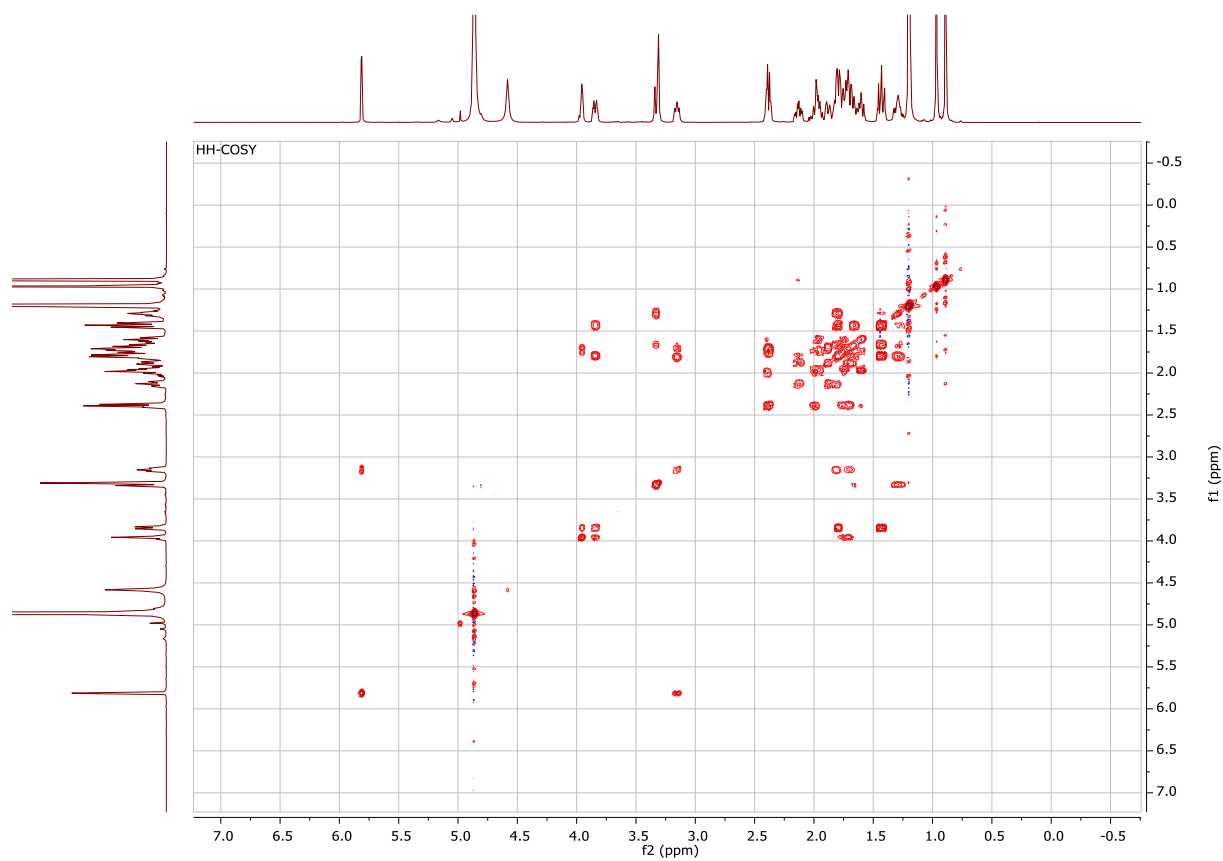

**Figure S3.** HH-COSY spectrum (500 MHz, CD<sub>3</sub>OD) of compound **1**.

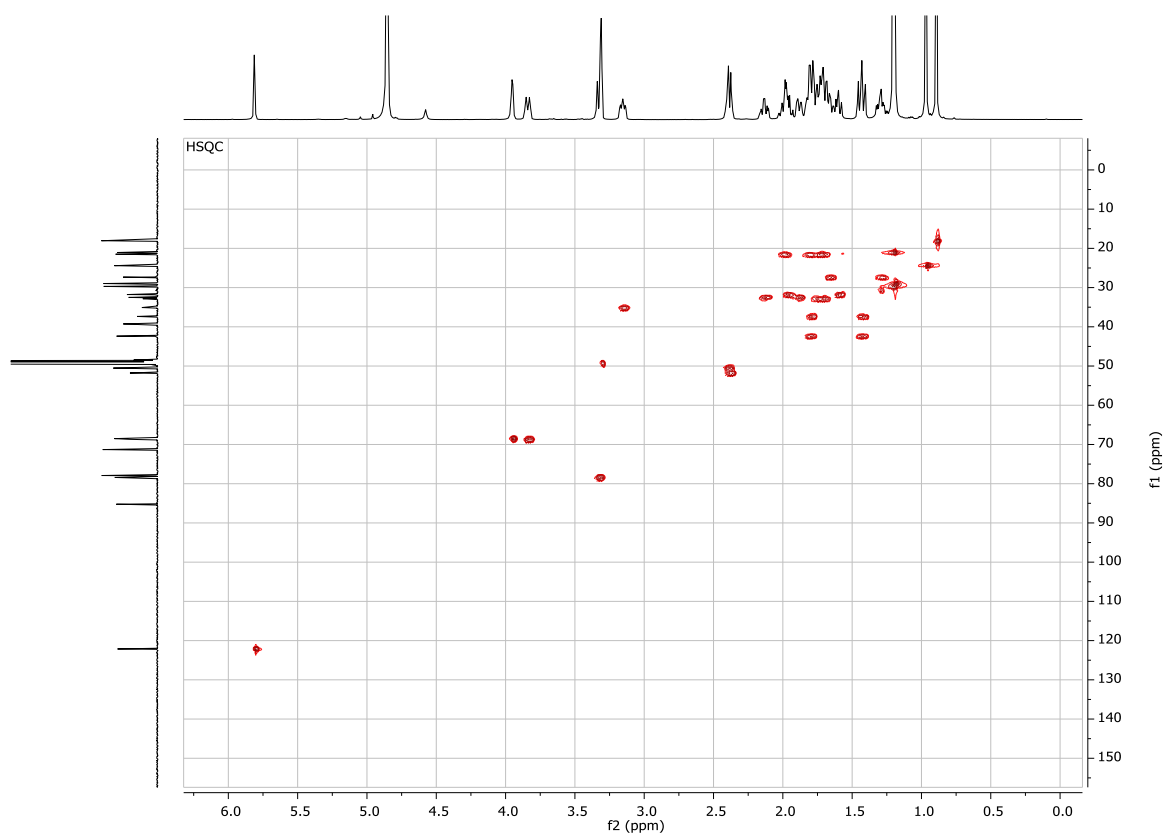

**Figure S4.** HSQC spectrum (500/125 MHz, CD<sub>3</sub>OD) of compound **1**.

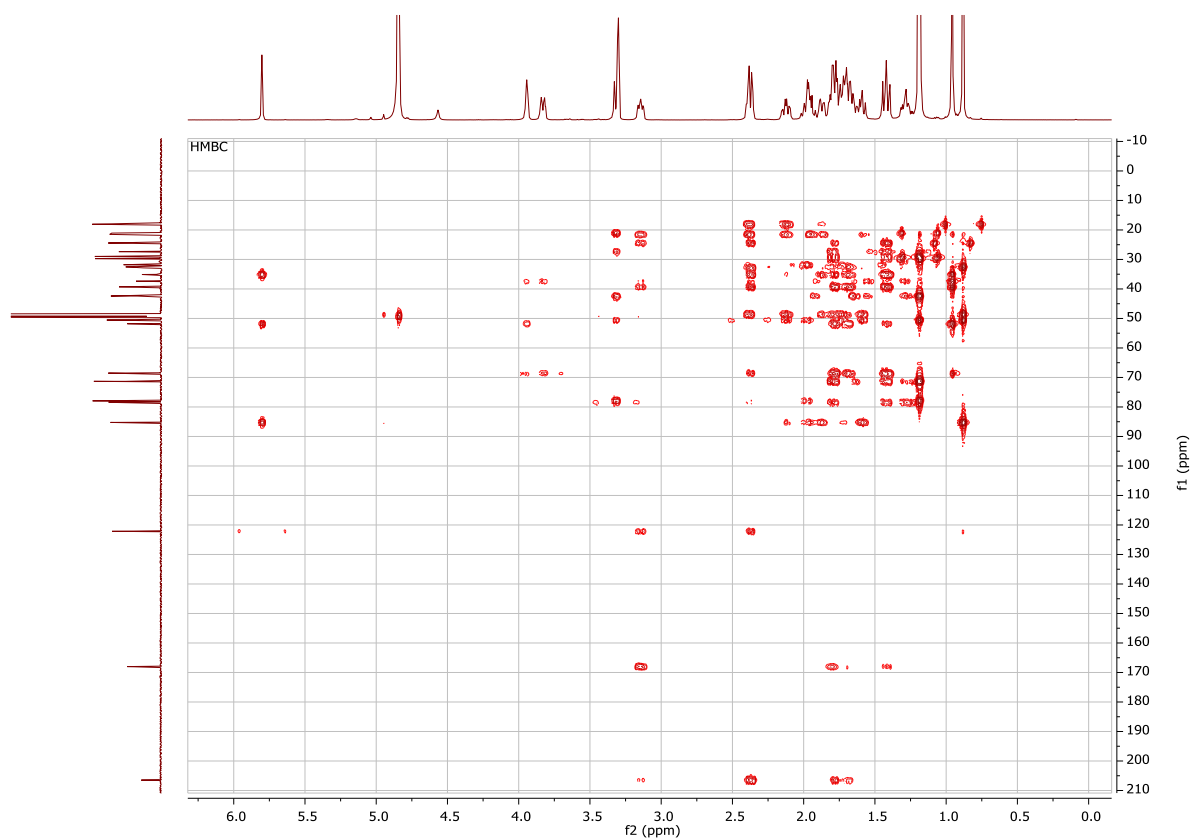

**Figure S5.** HMBC spectrum (500/125 MHz, CD<sub>3</sub>OD) of compound **1**.

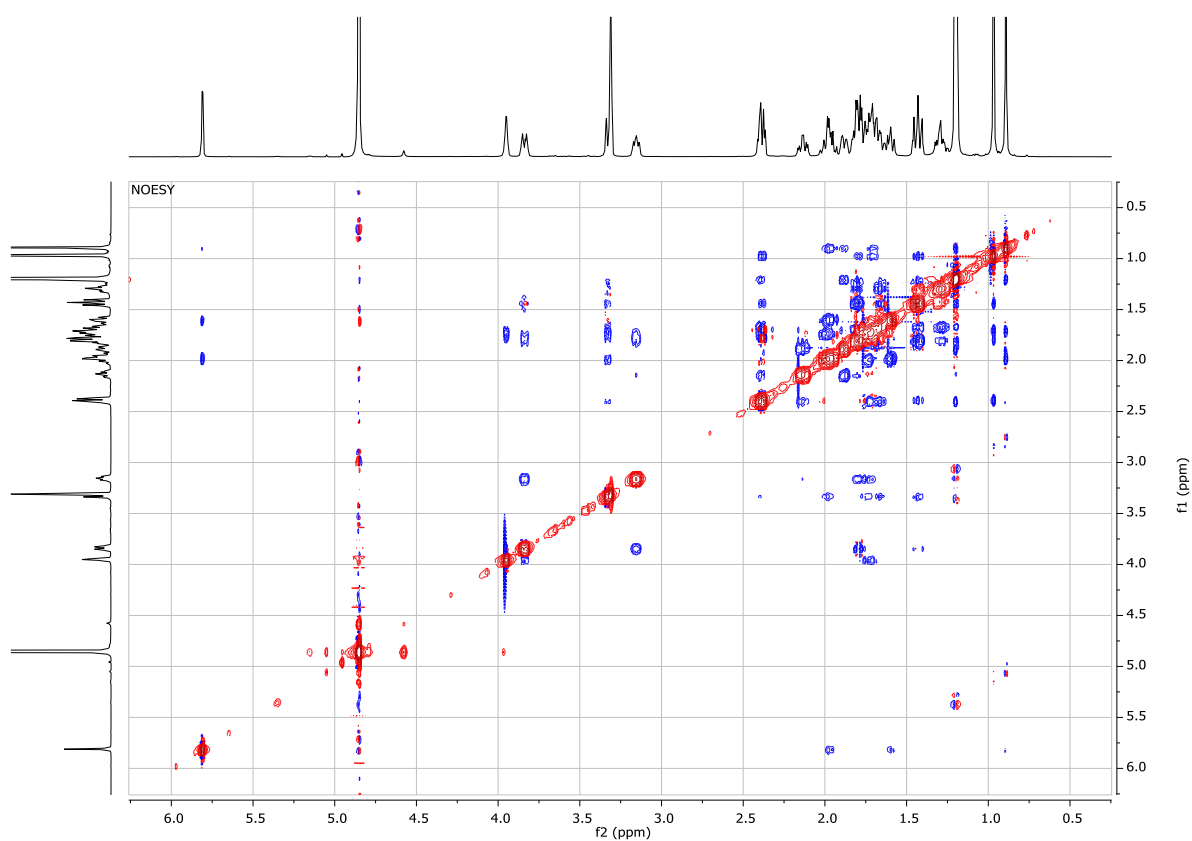

**Figure S6.** NOESY spectrum (500 MHz, CD<sub>3</sub>OD) of compound **1**.

## Compound 2 (polypodine B)

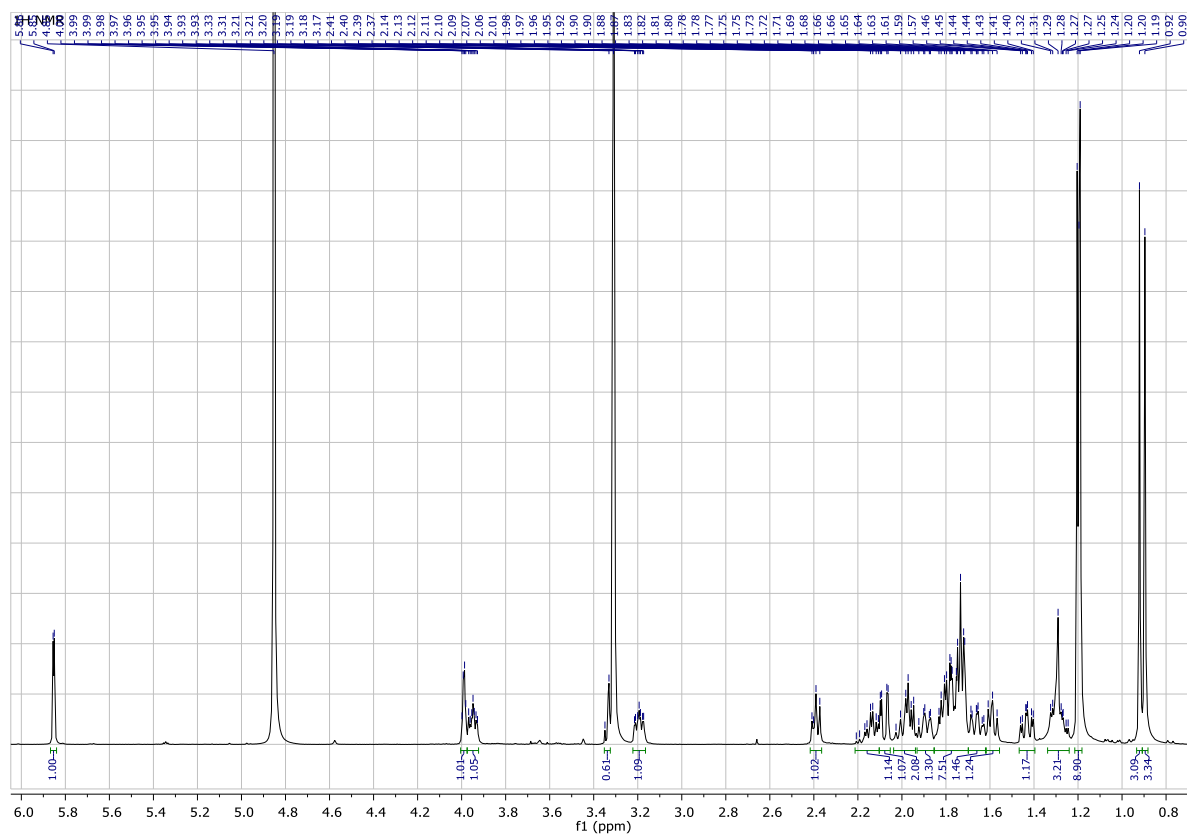

Figure S7. <sup>1</sup>H NMR spectrum (500 MHz, CD<sub>3</sub>OD) of compound 2.

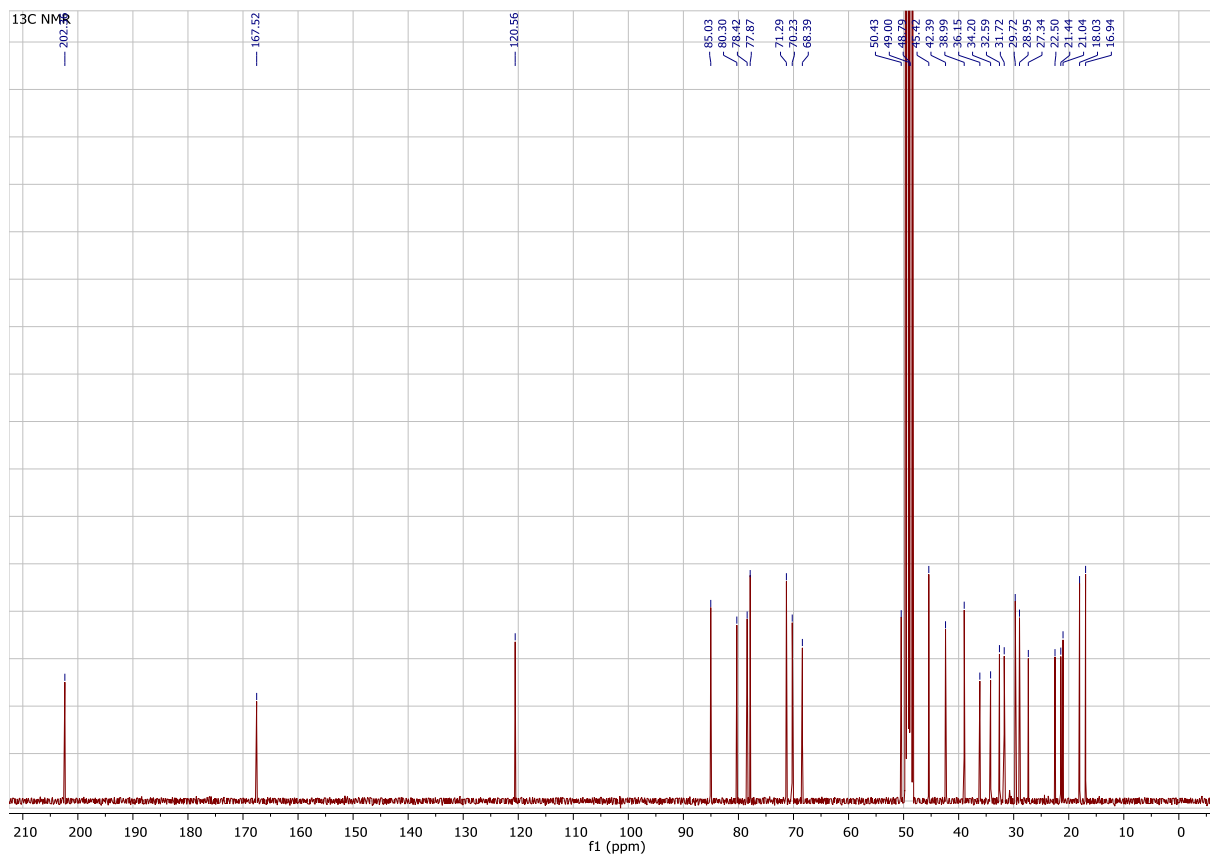

Figure S8. <sup>13</sup>C NMR spectrum (125 MHz, CD<sub>3</sub>OD) of compound 2.

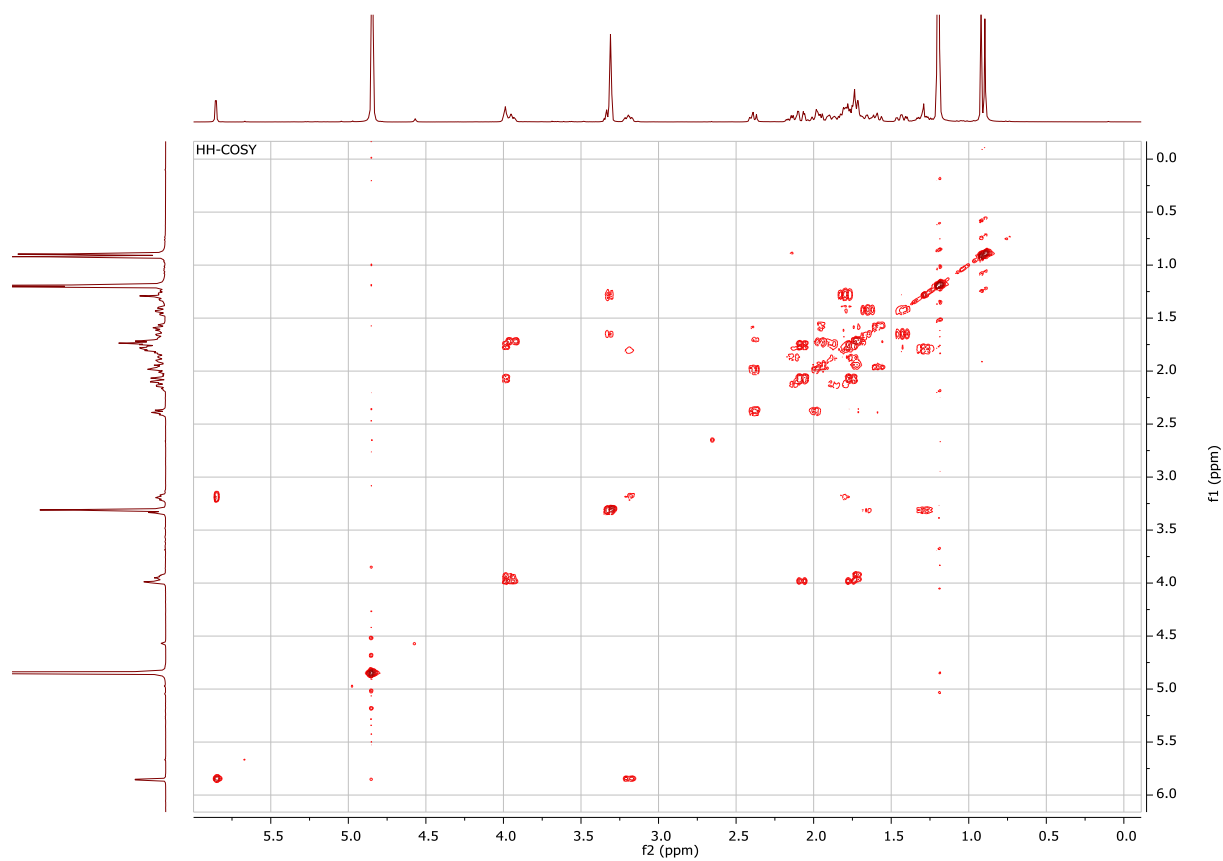

**Figure S9.** HH-COSY spectrum (500 MHz, CD<sub>3</sub>OD of compound **2**.

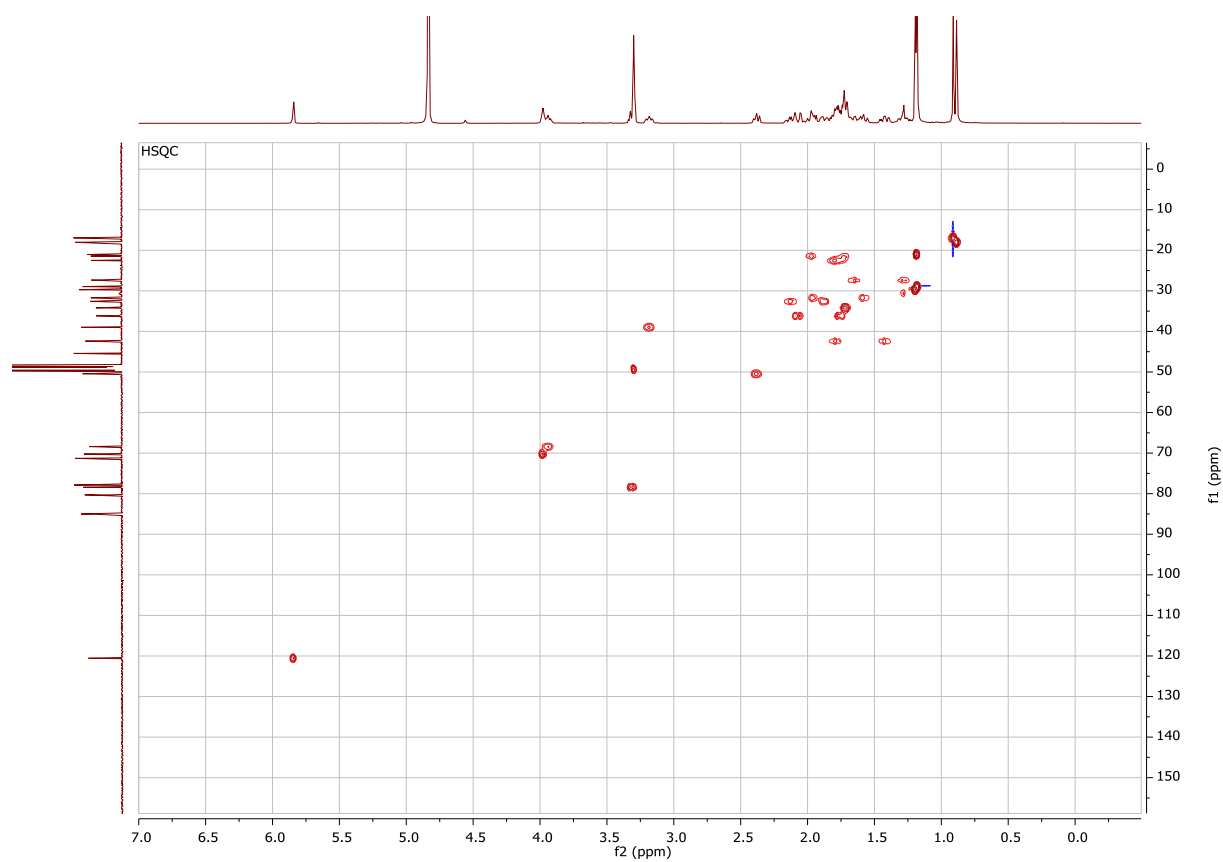

**Figure S10.** HSQC spectrum (500/125 MHz, CD<sub>3</sub>OD) of compound **2**.

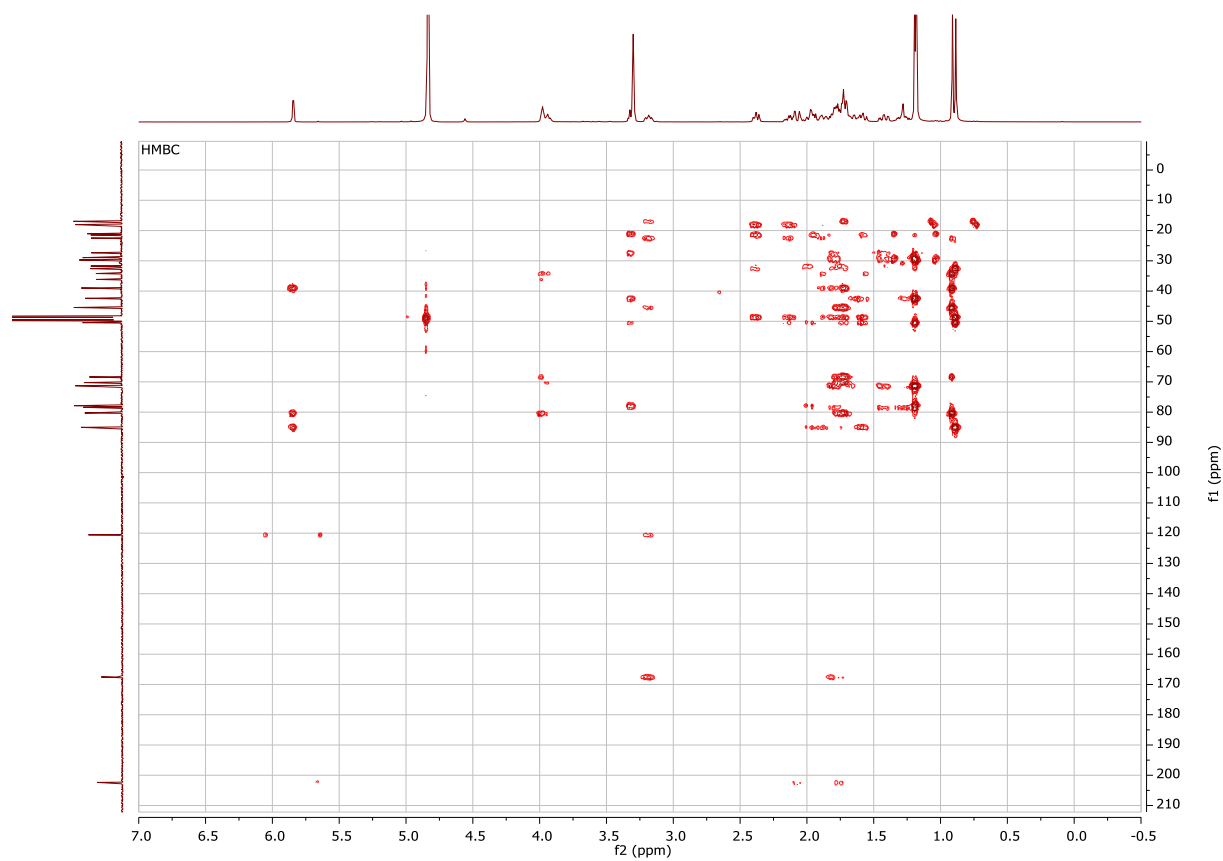

**Figure S11.** HMBC spectrum (500/125 MHz,  $\text{CD}_3\text{OD}$ ) of compound 2.

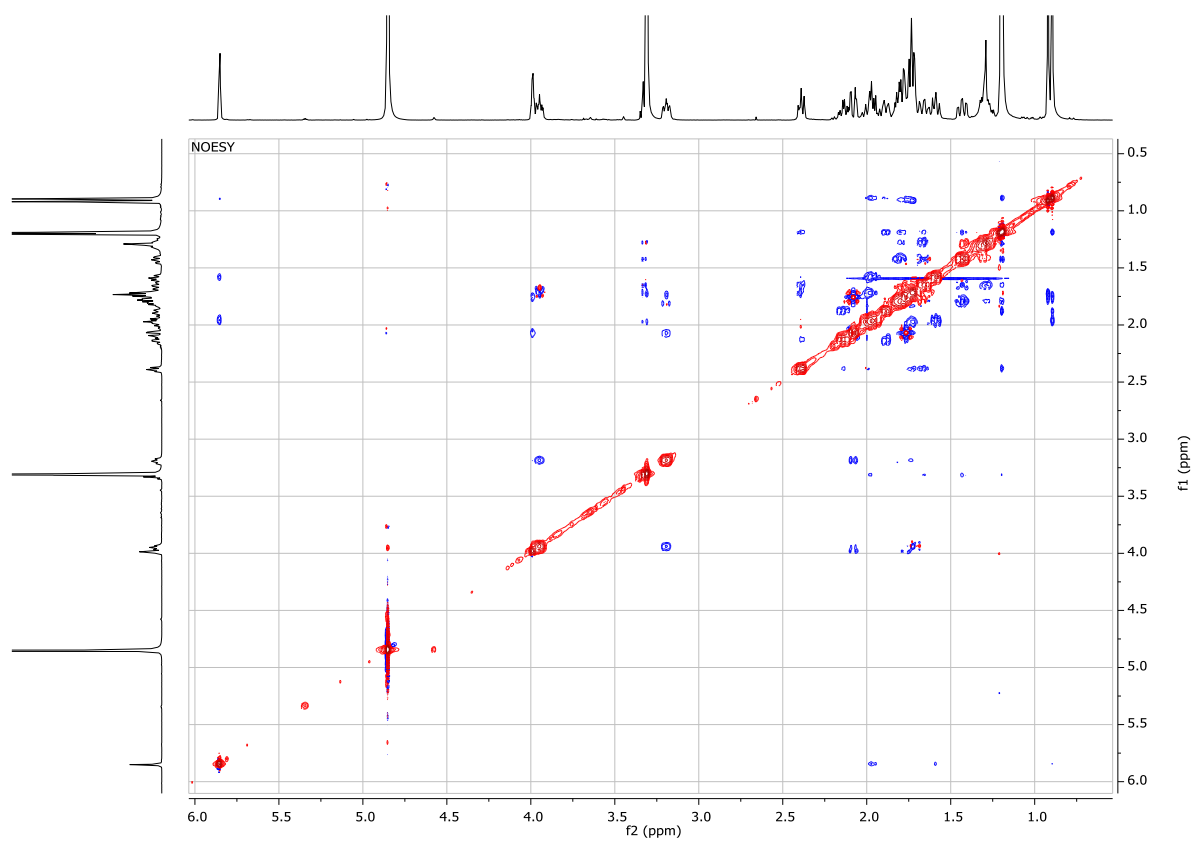

**Figure S12.** NOESY spectrum (500 MHz,  $\text{CD}_3\text{OD}$ ) of compound 2.



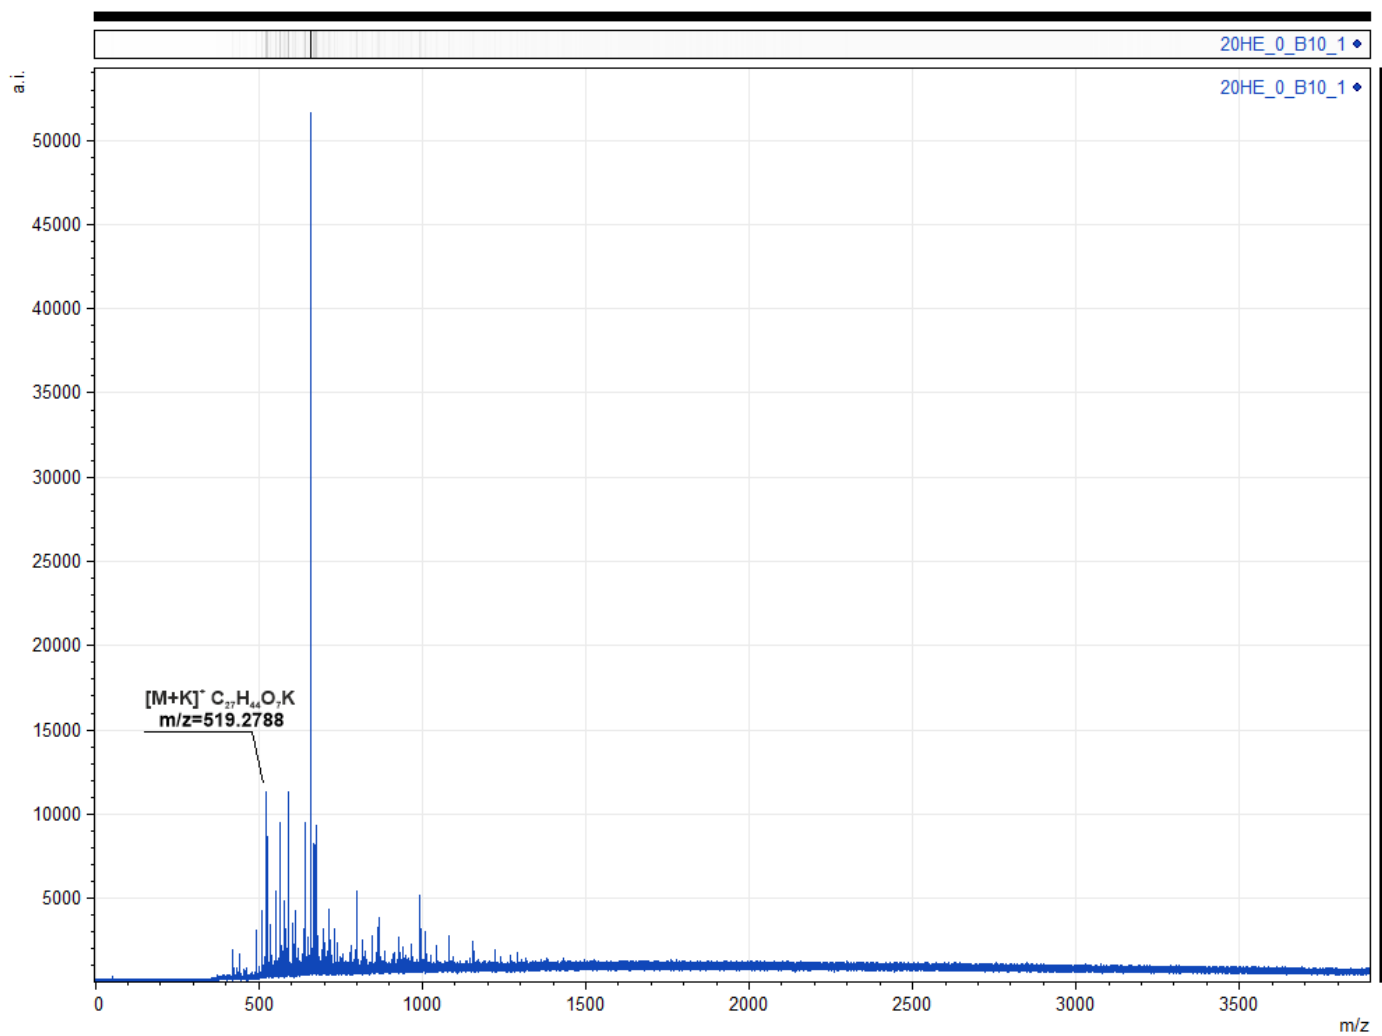

**Figure S13.** MALDI mass spectrum of 20-hydroxyecdysone (**1**) showing pseudo-molecular ion at  $m/z = 519.2788$ ,  $[M+K]^+$   $C_{27}H_{44}O_7K$  requires 519.2719.

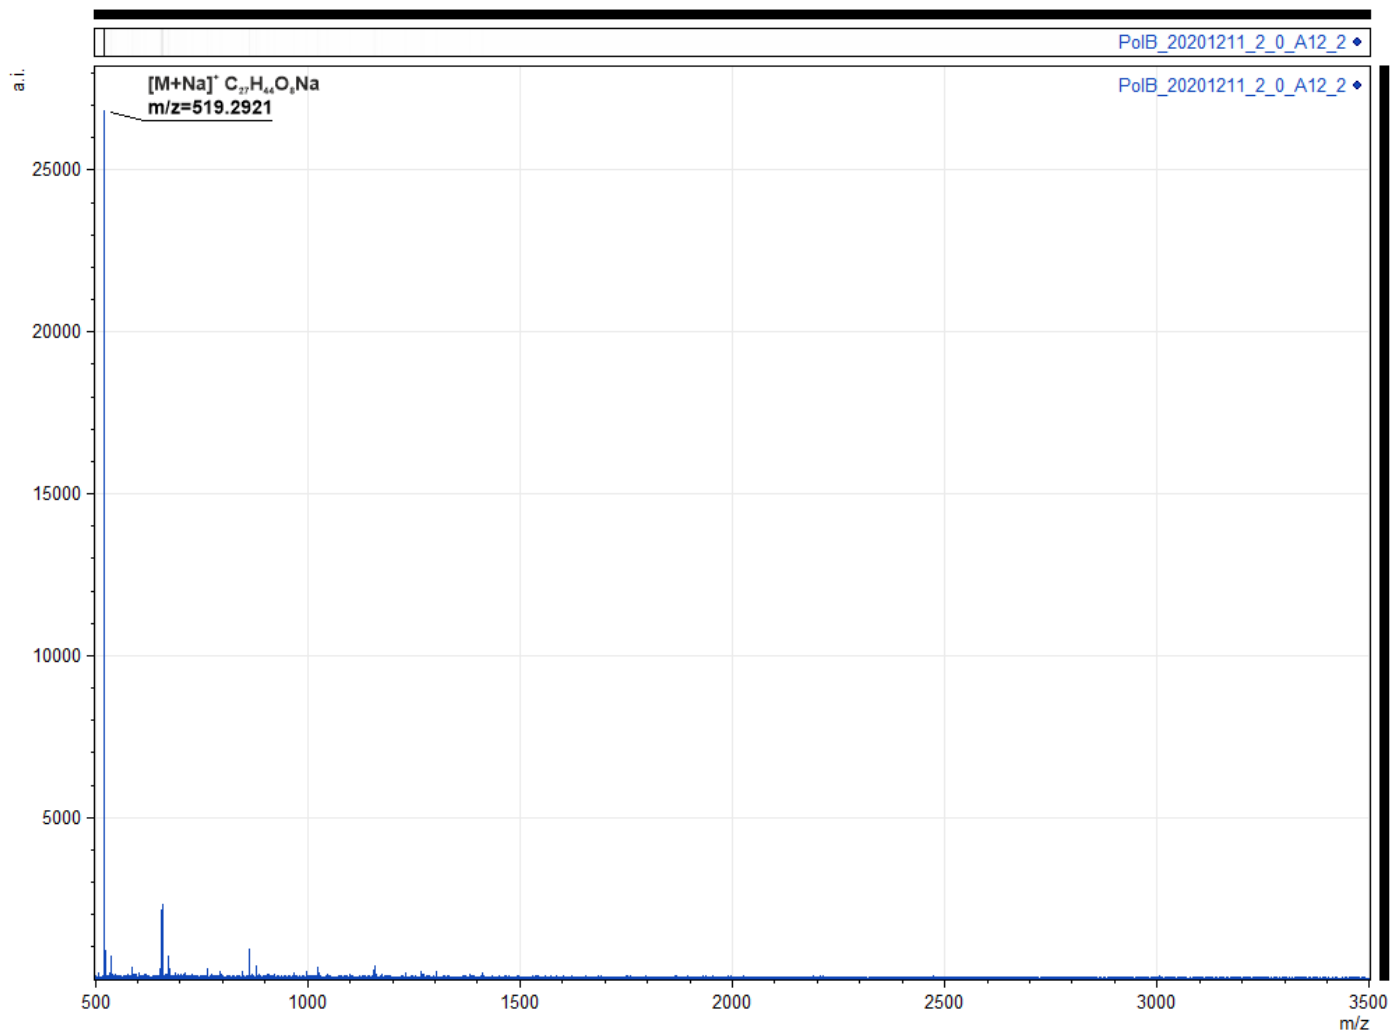

**Figure S14.** MALDI mass spectrum of polypodine B (2) showing pseudo-molecular ion at  $m/z = 519.2921$ ,  $[M+Na]^+$   $C_{27}H_{44}O_8Na$  requires 519.2928.

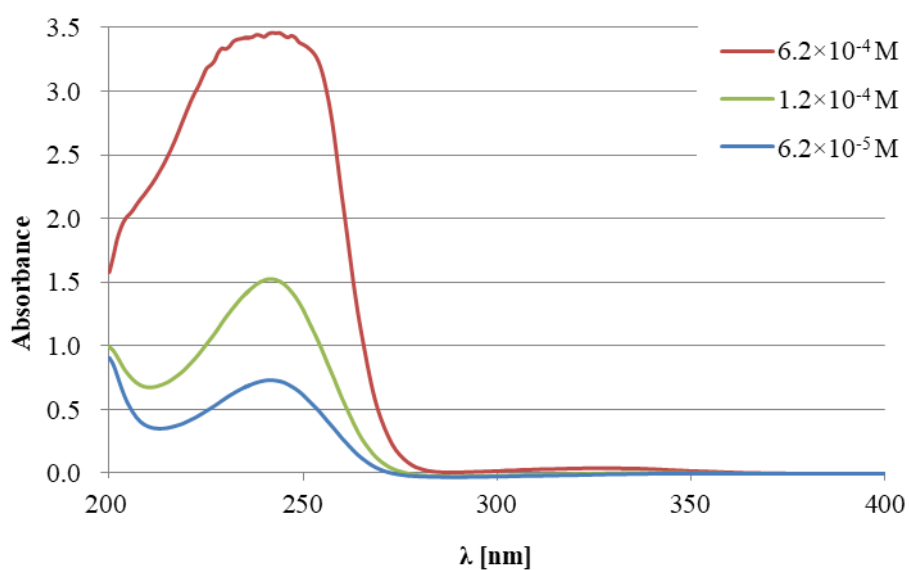

**Figure S15.** Concentration-dependent UV-Vis spectra of 20-hydroxyecdysone recorded in methanol. The concentration values are given in  $\text{mol/dm}^3$ ;  $\lambda_{\text{max}} = 242 \text{ nm}$ ,  $\log \epsilon = 4.07$

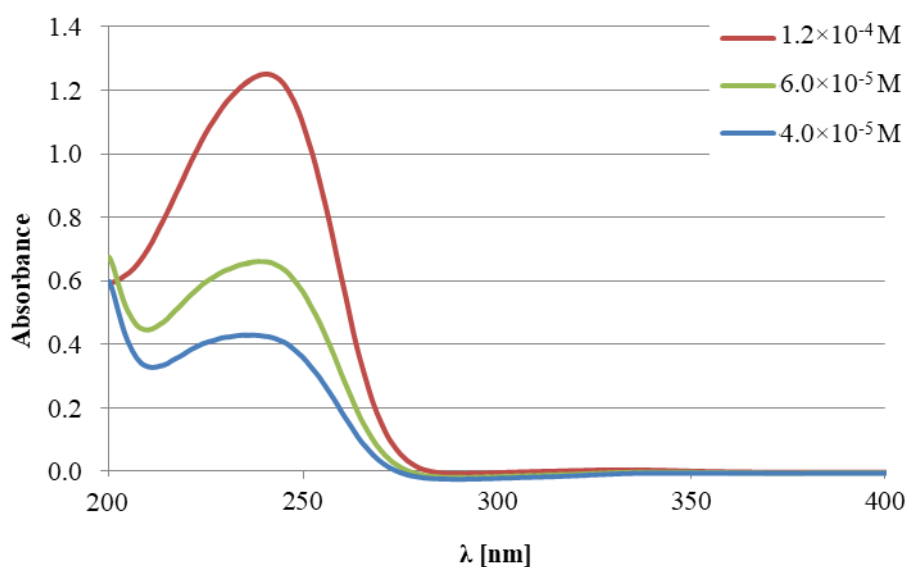

**Figure S16.** Concentration-dependent UV-Vis spectra of polypodine B recorded in ethanol. The concentration values are given in mol/dm<sup>3</sup>;  $\lambda_{\text{max}} = 237 \text{ nm}$ ,  $\log \epsilon = 4.03$

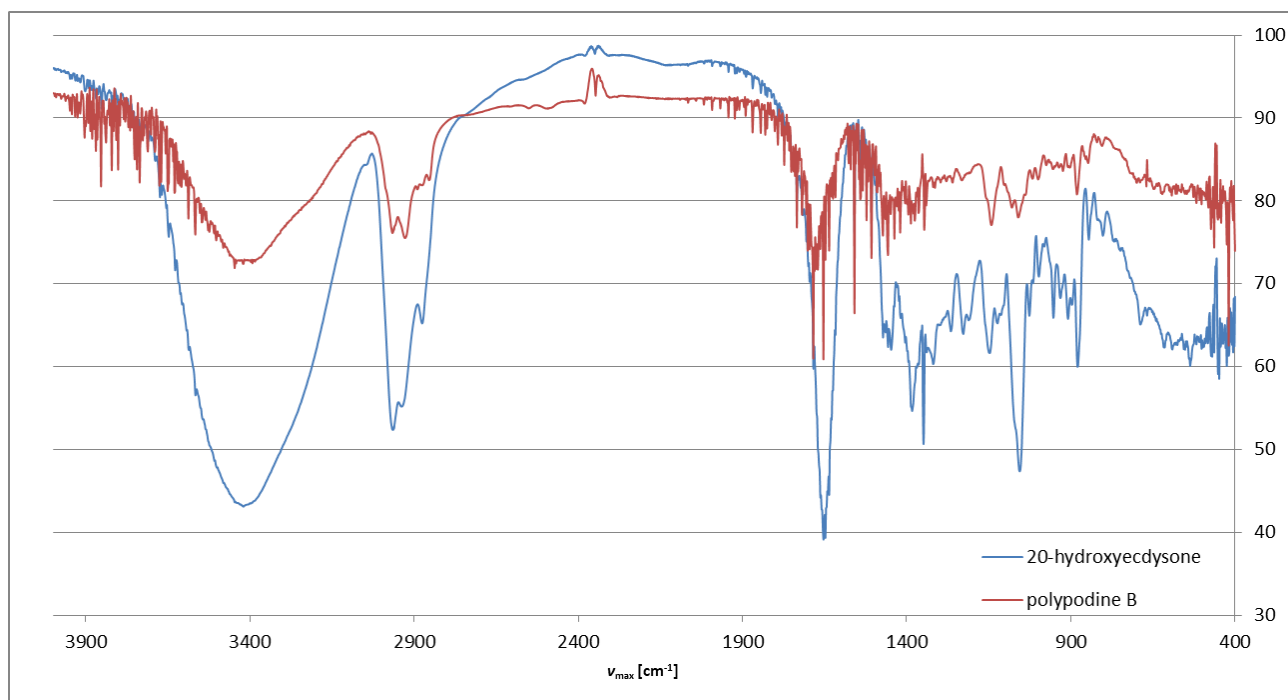

**Figure S17.** FT-IR spectra of 20-hydroxyecdysone (1); and polypodine B (2);

IR data for 20-hydroxyecdysone (KBr,  $\nu_{\text{max}}/\text{cm}^{-1}$ ): 2958s (CH<sub>3</sub>, CH<sub>2</sub>), 2927s (CH<sub>3</sub>, CH<sub>2</sub>), 2872s (CH<sub>3</sub>, CH<sub>2</sub>), 1678s (C=O), 1647s (C=C), 1635s (C=C), 1558s, 1379s (CH<sub>3</sub>, C-OH), 1348s (C-OH), 1313w (C-OH), 1261w (C-OH), 1224w (CH<sub>3</sub>, C-OH), 1141s (C-CH<sub>3</sub>), 1114w (C-C), 1051s (cyclohexane, CH<sub>2</sub>-OH), 1022w (cyclohexane), 993w (C-C), 950w (C-H), 875s, 840w (C-C).

IR data for polypodine B (KBr,  $\nu_{\text{max}}/\text{cm}^{-1}$ ): 2933s (CH<sub>3</sub>, CH<sub>2</sub>), 2918s (CH<sub>3</sub>, CH<sub>2</sub>), 2848s (CH<sub>3</sub>, CH<sub>2</sub>), 1683s (C=O), 1652s (C=C), 1635s (C=C), 1558s, 1346s (C-OH), 1338w (C-OH), 1307w (C-OH), 1302w (C-OH), 1286w (C-OH), 1271w (C-OH), 1253w (C-OH), 1223w (CH<sub>3</sub>, C-OH), 1136s (C-CH<sub>3</sub>), 1070s (cyclohexane, CH<sub>2</sub>-OH), 1053s (cyclohexane, CH<sub>2</sub>-OH), 1012w (cyclohexane), 993w (C-C), 877s, 842w (C-C).

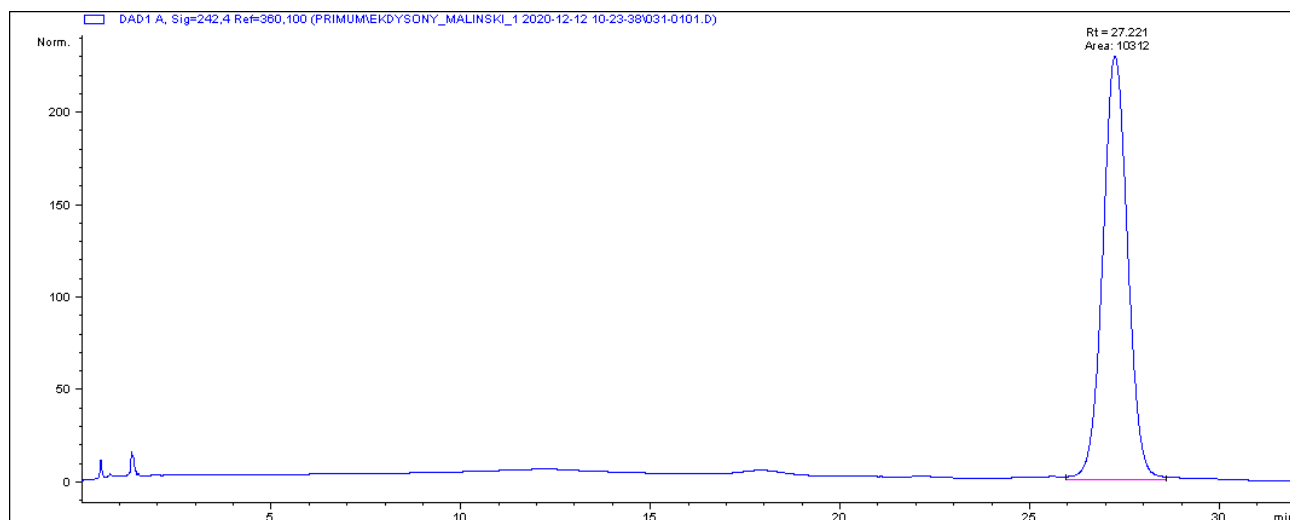

**Figure S18.** HPLC-DAD chromatogram of isolated 20-hydroxyecdysone (1).

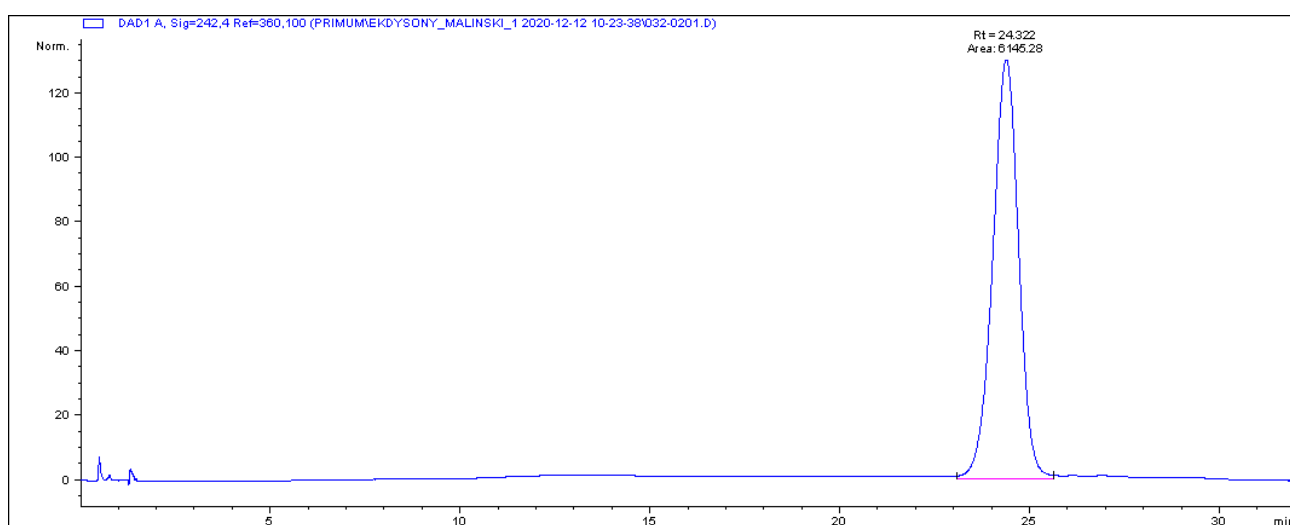

**Figure S19.** HPLC-DAD chromatogram of isolated polypodine B (2).

## Quantitative evaluation of ecdysteroids in fractions

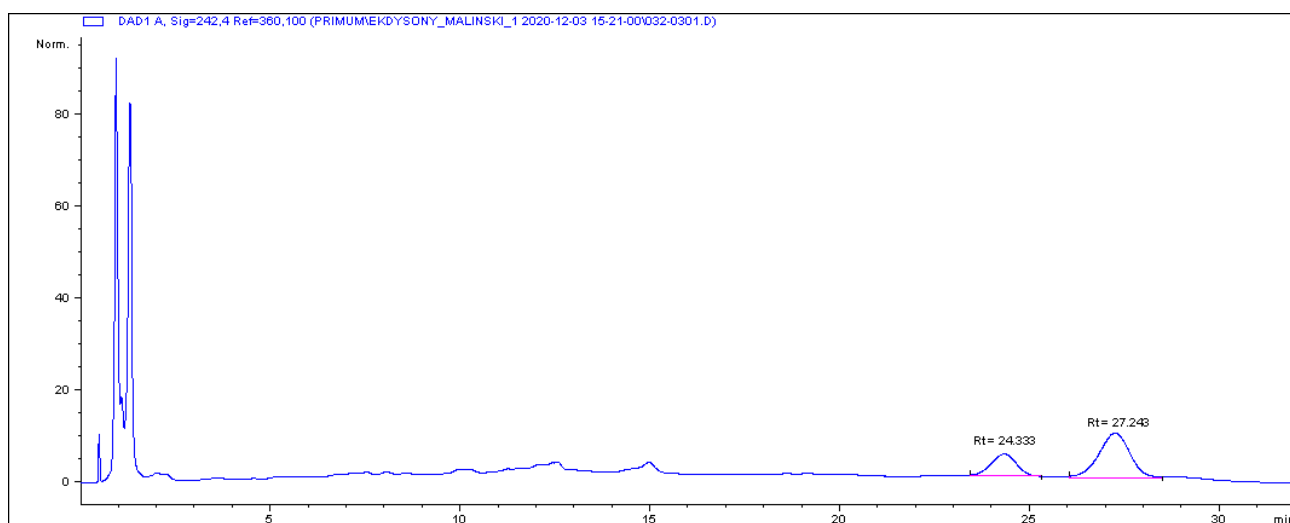

**Figure S20.** HPLC-DAD chromatogram of 40% methanolic root fraction showing 20-hydroxyecdysone (**1**) and polypodine B (**2**).

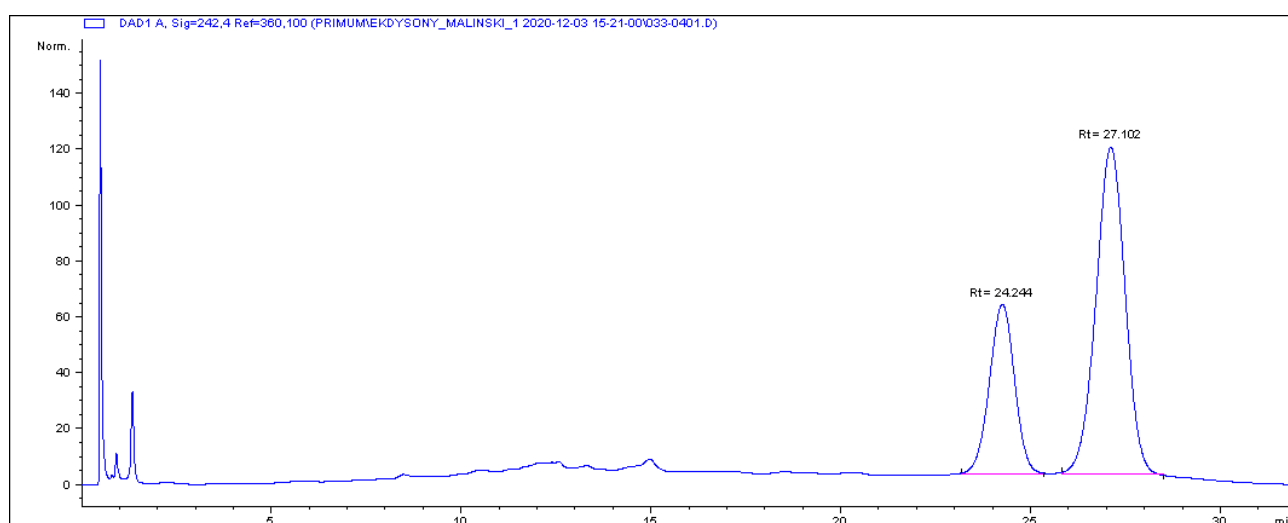

**Figure S21.** HPLC-DAD chromatogram of 80% methanolic root fraction showing 20-hydroxyecdysone (**1**) and polypodine B (**2**).

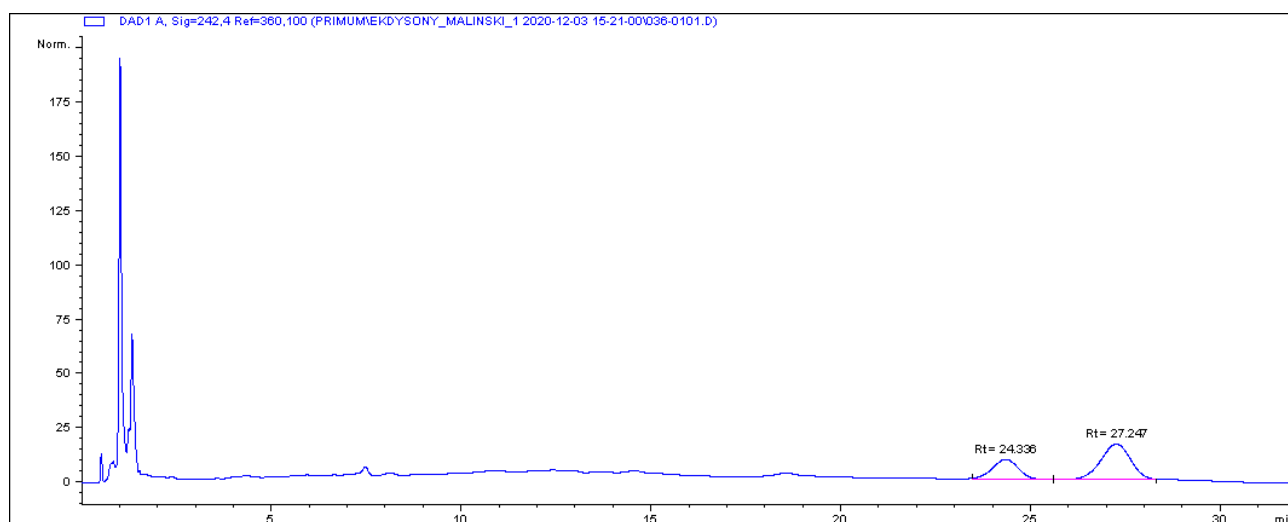

**Figure S22.** HPLC-DAD chromatogram of 40% methanolic herb fraction showing 20-hydroxyecdysone (**1**) and polypodine B (**2**).

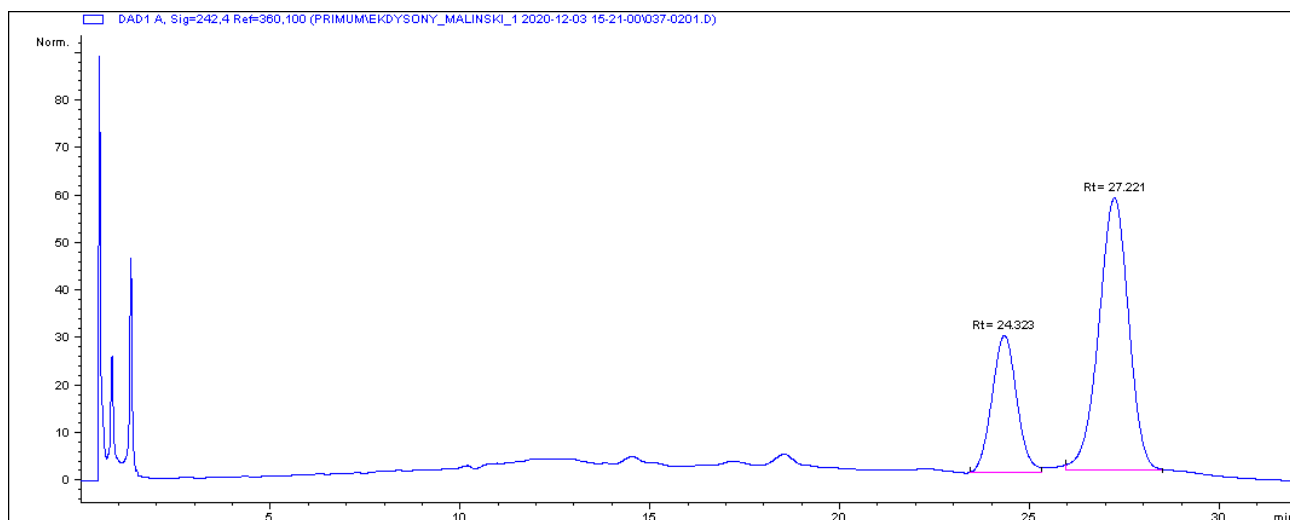

**Figure S23.** HPLC-DAD chromatogram of 80% methanolic herb fraction showing 20-hydroxyecdysone (**1**) and polypodine B (**2**).

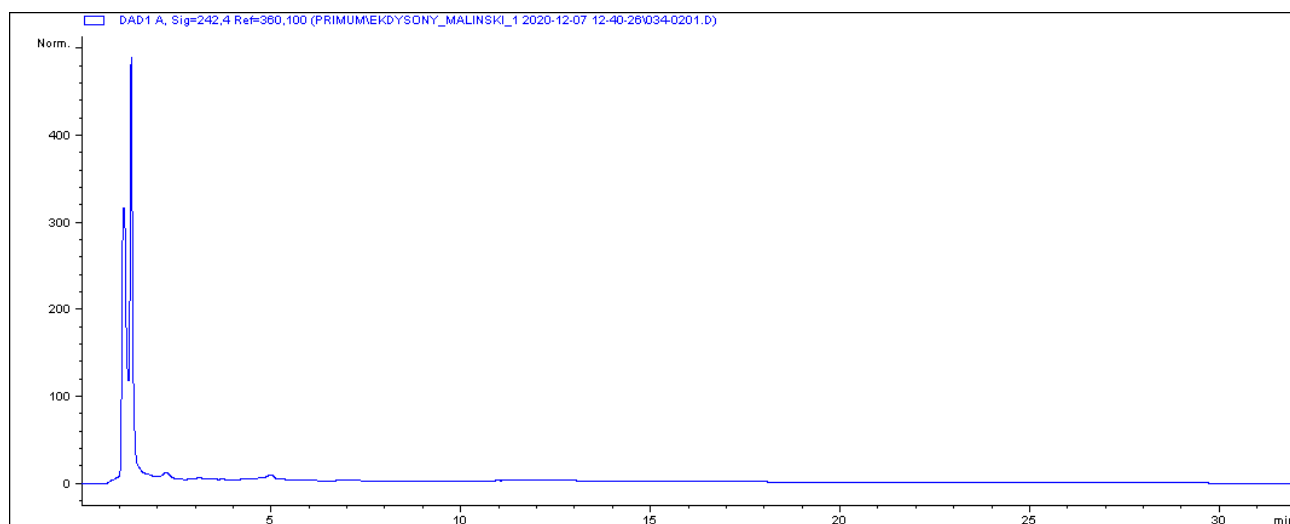

**Figure S24.** HPLC-DAD chromatogram of 40% methanolic callus fraction showing no ecdysteroids.

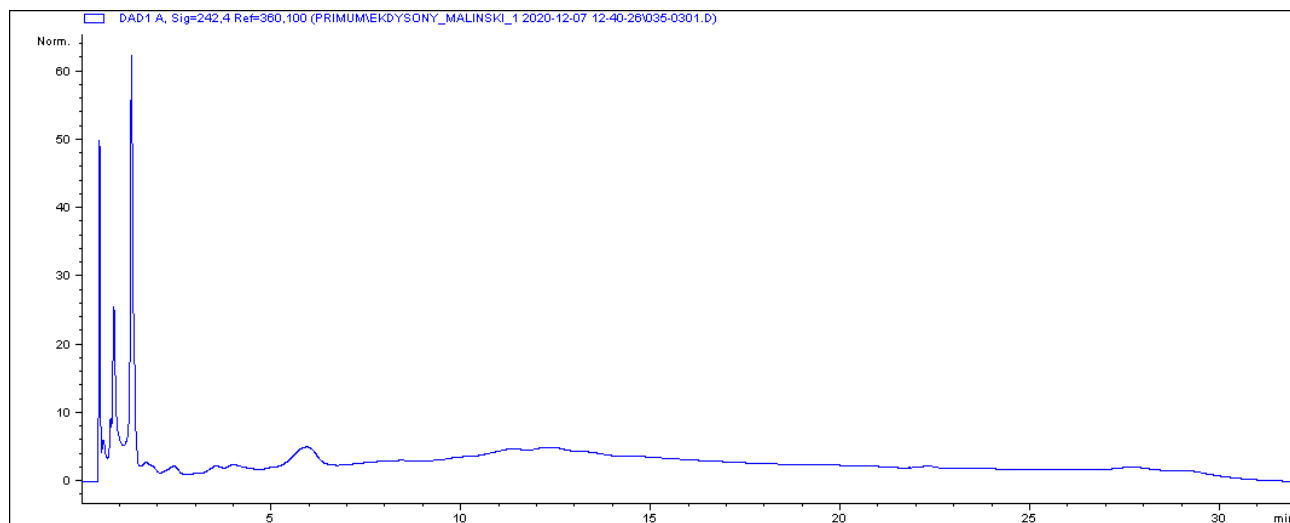

**Figure S25.** HPLC-DAD chromatogram of 80% methanolic callus fraction showing no ecdysteroids.

## Additional Experimental Data

**Table S1.** The effect of nystatin (positive control) on *Acanthamoeba* trophozoite inhibition during three-day treatment.

| Nystatin<br>concentration<br>[mg/mL] | Duration of treatment [days] |                     |                     |
|--------------------------------------|------------------------------|---------------------|---------------------|
|                                      | 1 <sup>st</sup> day          | 2 <sup>nd</sup> day | 3 <sup>rd</sup> day |
|                                      | MT $\pm$ SD                  | MT $\pm$ SD         | MT $\pm$ SD         |
| control                              | 5.89 $\pm$ 2.05              | 14.25 $\pm$ 3.03    | 19.94 $\pm$ 3.55    |
| 0.05                                 | 2.93 $\pm$ 1.01*             | 2.28 $\pm$ 0.80*    | 8.44 $\pm$ 1.42*    |
| 0.1                                  | 2.76 $\pm$ 1.00*             | 1.39 $\pm$ 0.83*    | 3.66 $\pm$ 2.09*    |
| 0.2                                  | 2.61 $\pm$ 0.95*             | 1.17 $\pm$ 0.89*    | 2.56 $\pm$ 0.76*    |

MT - mean trophozoite number in haemocytometer chamber \* P<0.05 statistically significant difference in comparison with the control during the same time interval; n=18

**Table S2.** The toxicity of studied 40% and 80% aqueous methanolic fractions from *Lychnis flos-cuculi* extracts and isolated ecdysteroids against *Aliivibrio fischeri* after 5 and 15 minutes, measured with the use of Microtox assay.

| Sample                 | Sample dilution<br>[mg/mL] | Ecdysteroid content [ $\mu$ g/mL] |       | Cell viability decrease [%] |            |
|------------------------|----------------------------|-----------------------------------|-------|-----------------------------|------------|
|                        |                            | 20E                               | polB  | t = 5 min                   | t = 15 min |
| Root, 40% fraction     | 5                          | 15                                | 12.3  | 56.51%                      | 63.27%     |
|                        | 0.5                        | 1.5                               | 1.2   | 15.76%                      | 20.12%     |
| Root, 80% fraction     | 5                          | 184.4                             | 124.4 | 99.30%                      | 99.99%     |
|                        | 2.5                        | 92.2                              | 62.2  | 88.01%                      | 95.65%     |
|                        | 0.5                        | 18.4                              | 12.4  | 49.50%                      | 52.39%     |
|                        | 0.05                       | 1.8                               | 1.2   | 29.72%                      | 31.48%     |
| Herb, 40% fraction     | 5                          | 25.5                              | 22.7  | 88.43%                      | 88.75%     |
|                        | 0.5                        | 2.5                               | 2.3   | 29.14%                      | 35.59%     |
| Herb, 80% fraction     | 5                          | 91.3                              | 57.2  | 99.93%                      | 99.93%     |
|                        | 2.5                        | 45.7                              | 28.6  | 99.96%                      | 99.94%     |
|                        | 0.5                        | 9.1                               | 5.7   | 68.31%                      | 68.03%     |
|                        | 0.05                       | 0.9                               | 0.6   | 35.08%                      | 36.34%     |
| Callus, 40% fraction   | 5                          | 0                                 | 0     | 99.50%                      | 99.79%     |
|                        | 0.5                        | 0                                 | 0     | 42.89%                      | 45.86%     |
| Callus, 80% fraction   | 5                          | 0                                 | 0     | 99.93%                      | 99.93%     |
|                        | 2.5                        | 0                                 | 0     | 99.94%                      | 99.94%     |
|                        | 0.5                        | 0                                 | 0     | 60.17%                      | 59.24%     |
|                        | 0.05                       | 0                                 | 0     | 36.57%                      | 37.81%     |
| 20-hydroxyecdysone (1) | 1                          | 1000                              | 0     | 57.54%                      | 60.22%     |
|                        | 0.5                        | 500                               | 0     | 46.58%                      | 51.43%     |
| Polypodine B (2)       | 2                          | 0                                 | 2000  | 69.18%                      | 72.42%     |
|                        | 1                          | 0                                 | 1000  | 26.60%                      | 29.81%     |
|                        | 0.5                        | 0                                 | 500   | 6.50%                       | 12.98%     |

Abbreviations: 20E – 20-hydroxyecdysone, polB – polypodine B

**Table S3.** Concentration of 20-hydroxyecdysone and polypodine B in respective dilutions of different *Lychnis flos-cuculi* material samples used in antiamebic activity bioassay.

| Sample       | Sample dilution<br>[mg/mL] | Ecdysteroid<br>concentration* | Peak amoeba<br>growth<br>inhibition [%] |
|--------------|----------------------------|-------------------------------|-----------------------------------------|
|              |                            | [ $\mu$ g/mL]                 |                                         |
| Herb extract | 1                          | 25.07                         | 19.20                                   |
|              | 5                          | 125.35                        | 26.23                                   |
|              | 10                         | 250.70                        | 47.08                                   |
| Root extract | 1                          | 37.48                         | 30.92                                   |

|                      |      |        |       |
|----------------------|------|--------|-------|
|                      | 5    | 187.40 | 47.09 |
|                      | 10   | 374.80 | 91.10 |
| Root 40% fraction    | 0.5  | 2.72   | 26.52 |
|                      | 2.5  | 13.60  | 42.94 |
|                      | 5    | 27.20  | 87.27 |
| Root 80% fraction    | 0.05 | 3.09   | 19.62 |
|                      | 0.1  | 6.18   | 73.79 |
|                      | 0.5  | 30.88  | 88.64 |
| Herb 40% fraction    | 0.1  | 0.96   | 11.01 |
|                      | 0.5  | 4.81   | 12.79 |
|                      | 1    | 9.62   | 18.00 |
| Herb 80% fraction    | 0.1  | 2.97   | 28.31 |
|                      | 0.5  | 14.85  | 38.07 |
|                      | 1    | 29.70  | 41.10 |
| Callus, 40% fraction | 0.5  | 0      | 39.96 |
|                      | 1    | 0      | 73.88 |
|                      | 5    | 0      | 91.27 |
| Callus, 80% fraction | 0.2  | 0      | 25.52 |
|                      | 1    | 0      | 42.94 |
|                      | 2    | 0      | 90.40 |
| 20-hydroxyecdysone** | 0.05 | 50     | 41.72 |
|                      | 0.1  | 100    | 62.55 |
|                      | 0.5  | 500    | 97.87 |
| Polypodine B**       | 0.05 | 50     | 36.12 |
|                      | 0.1  | 100    | 56.88 |
|                      | 0.5  | 500    | 97.27 |

\* sum of 20-hydroxyecdysone and polypodine B, \*\* single compounds
